# Supplementary material
Source: PubMed Central journal article supplement (PMC1626150)

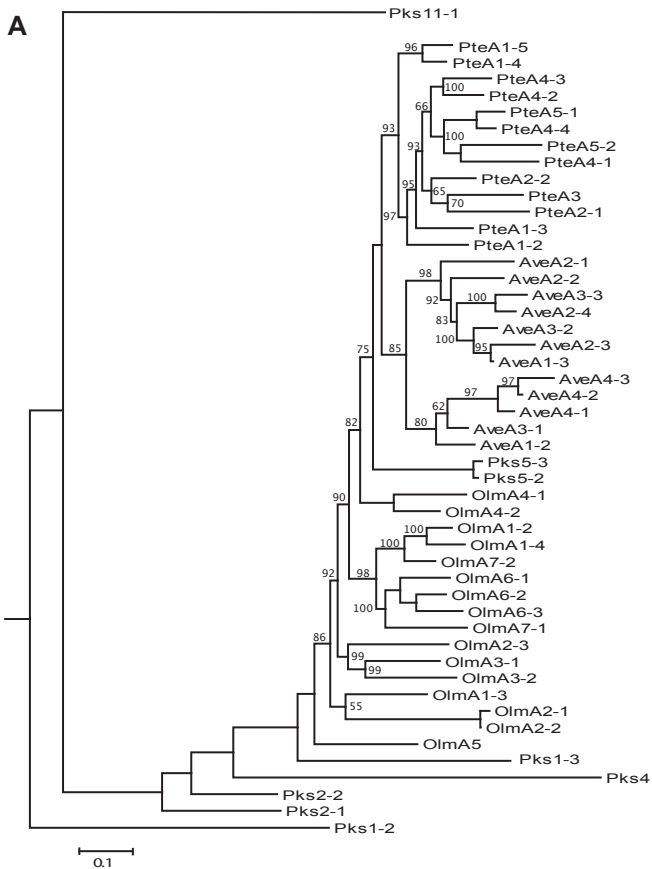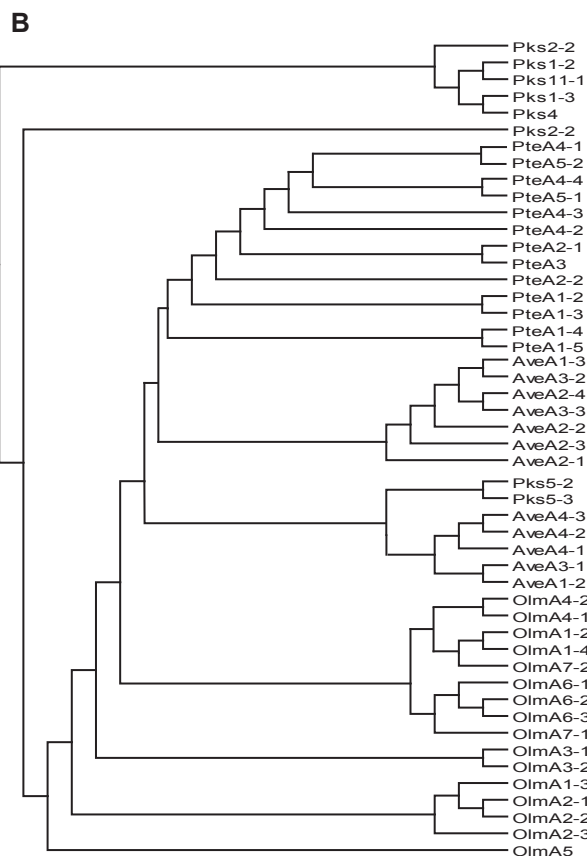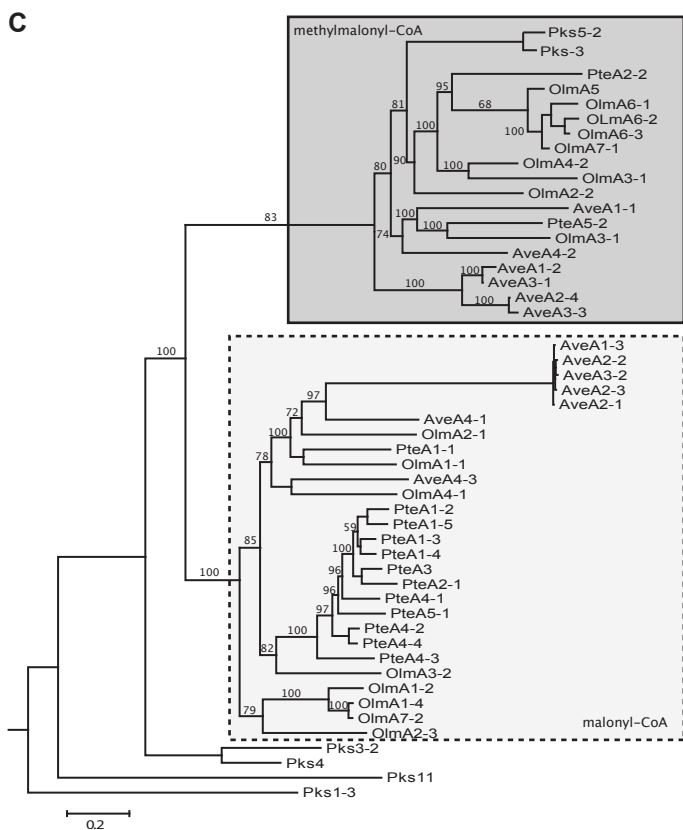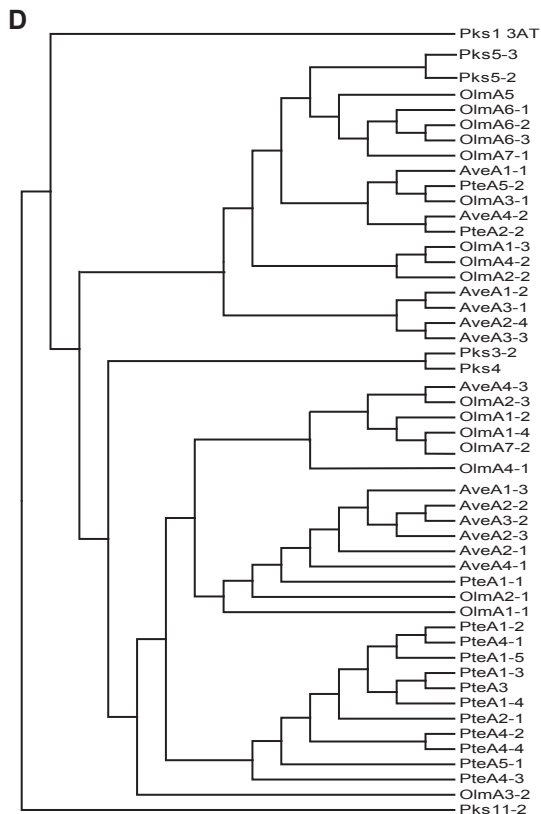

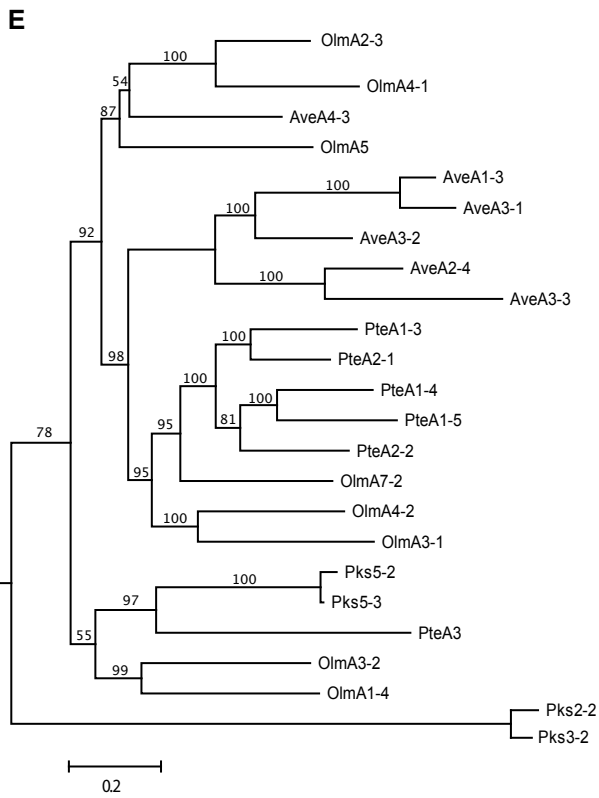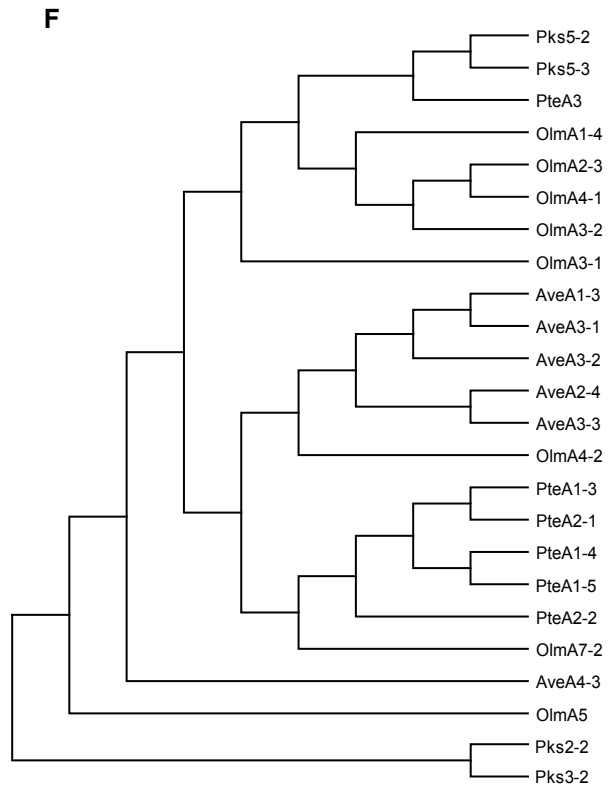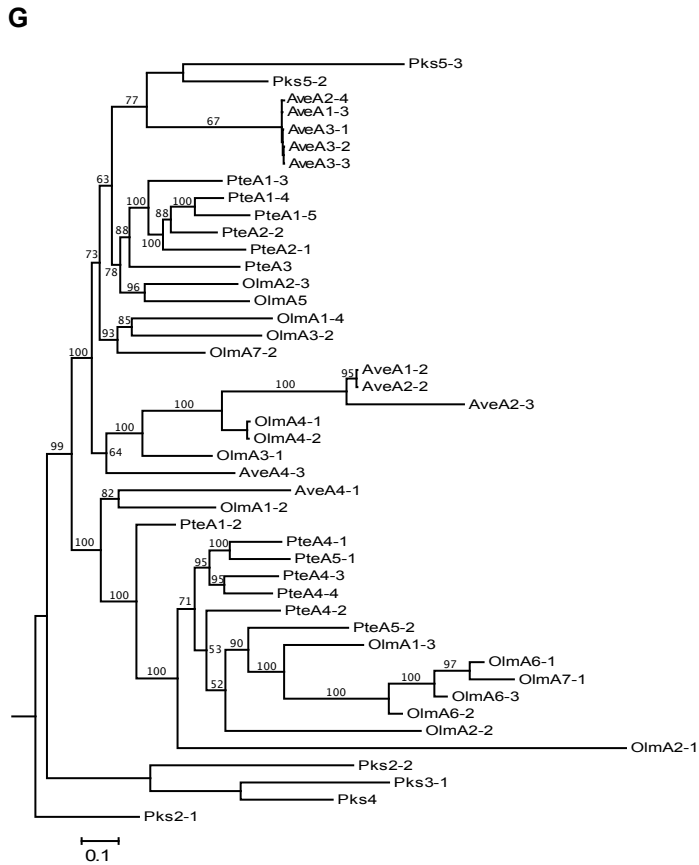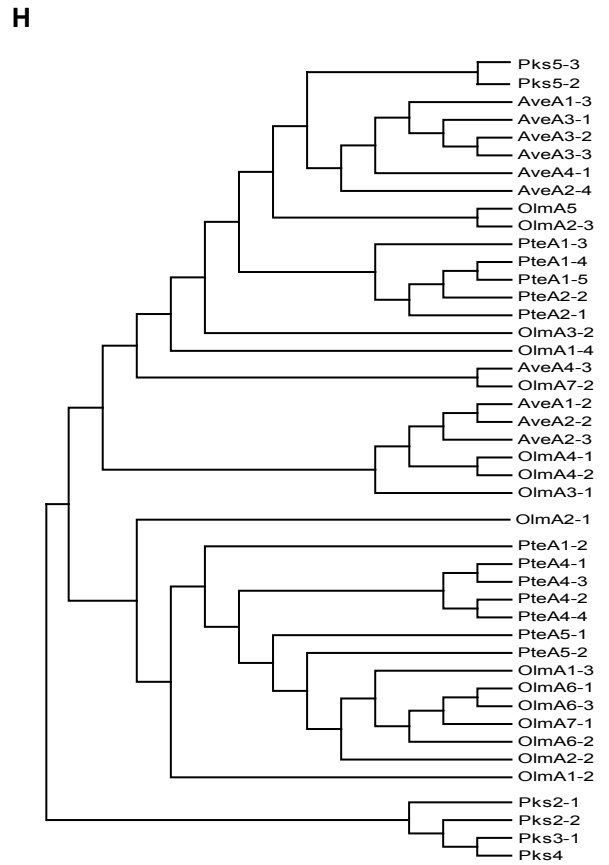

Supplement: pcbi.0020132.sg002.pdf [file pcbi.0020132.sg002.pdf]
